# Supplementary material
Source: MDPI journal article supplement (https://www.mdpi.com/2076-3263/10/11/448)
Supplement: s1 [file s1]

## Supplementary Materials

**Table 1.** Sedimentological properties of the luminescence dating sites. The sampling locations are marked with yellow stars.

| Sample ID                                                  | Taken from<br>Geomorphological Unit | Sedimentology                                   | Photo                                                                                |
|------------------------------------------------------------|-------------------------------------|-------------------------------------------------|--------------------------------------------------------------------------------------|
| <b>Samples taken from Terraces in Lower Catchment</b>      |                                     |                                                 |                                                                                      |
| C-T1-L                                                     | Terrace C-T1                        | Gravelly, with<br>sandy to loamy<br>matrix      |    |
| C-T2-L                                                     | Terrace C-T2                        | Gravelly, with<br>loamy to sandy<br>matrix      |   |
| C-T3-L                                                     | Terrace C-T3                        | Gravelly, with<br>loamy to sandy<br>matrix      |  |
| <b>Samples taken from Terraces at Apex of Alluvial Fan</b> |                                     |                                                 |                                                                                      |
| A-T1-L                                                     | Terrace A-T1                        | Very gravelly,<br>with loamy to<br>sandy matrix |  |

A-T2L-L

Terrace A-T2

Very gravelly,  
with sandy to  
loamy matrix

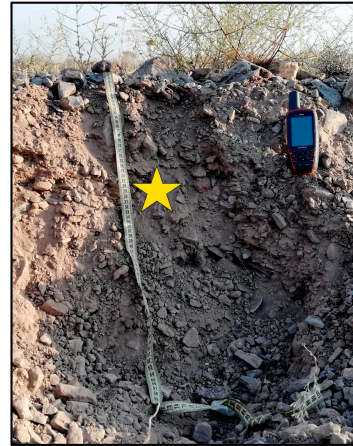

A-T2R-L

Terrace A-T2

Very gravelly,  
with sandy to  
loamy matrix

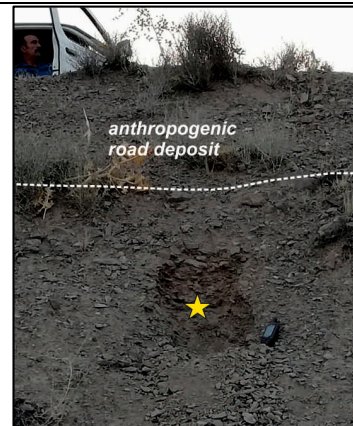

A-T3-L

Terrace A-T3

Gravelly, with  
loamy to sandy  
matrix

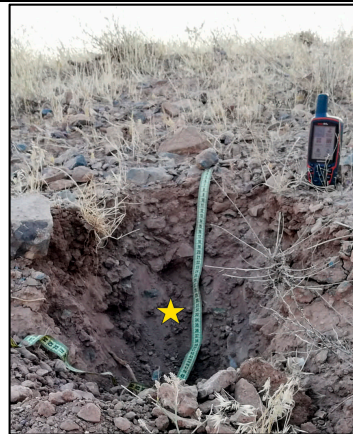

A-T4-L

Terrace A-T4

Gravelly, with  
sandy to loamy  
matrix

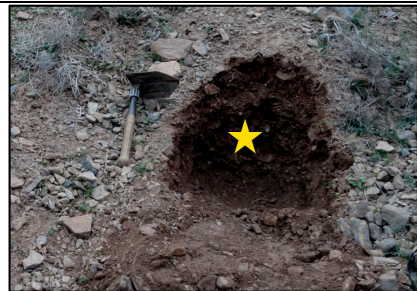

Samples taken from Alluvial Fan

---

A1-L

Generation II

Gravelly, with  
sandy to slightly  
loamy matrix

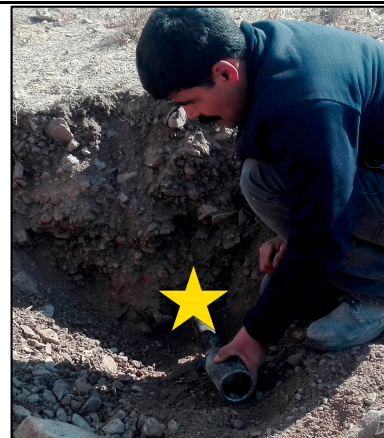

---

A2-L

Generation II

Very gravelly,  
with sandy to  
slightly loamy  
matrix

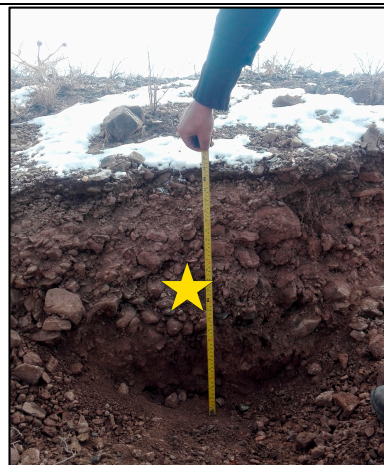

---

A4-L

Generation I

Very gravelly,  
with sandy to  
slightly loamy  
matrix

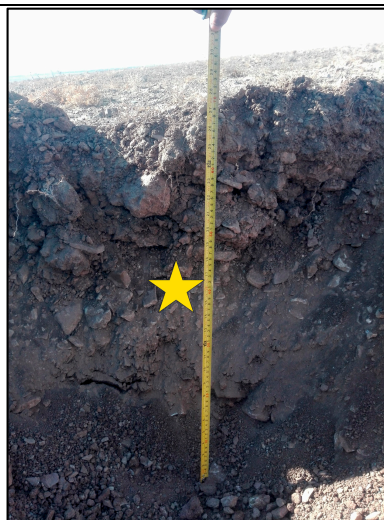



---

A5-L

Generation III

Gravelly, with  
sandy to slightly  
loamy matrix

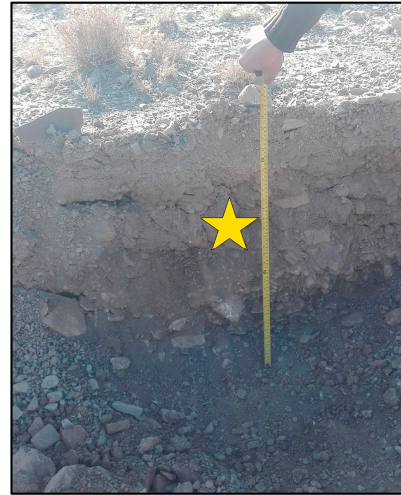

---

A7-L

Generation IV

Gravelly, with  
sandy to slightly  
loamy matrix

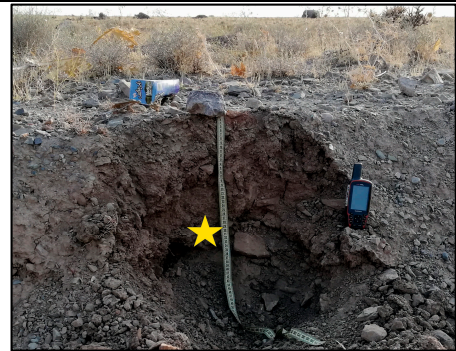

---

A8-L

Generation IV

Gravels in sandy  
to slightly loamy  
matrix

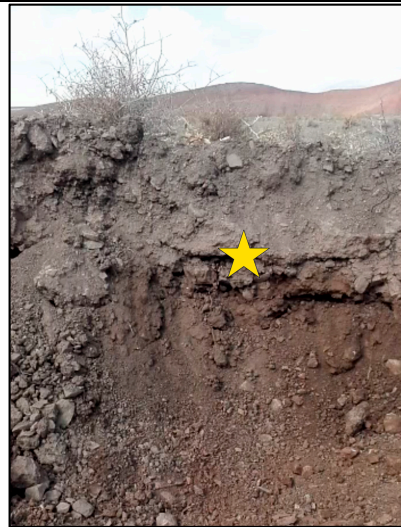

**Table S2.** pIRIR protocol (Buylaert et al., 2012).

| Step | Treatment                | Observed |
|------|--------------------------|----------|
| 1    | Give dose                | -        |
| 2    | Pre-heat (240-320 °C)    | -        |
| 3    | Stimulation at 50 °C     | Lx       |
| 4    | Stimulation at 290 °C    | Lx       |
| 5    | Give test dose           | -        |
| 6    | Pre-heat (240–320 °C)    | -        |
| 7    | Stimulation at 50 °C     | Tx       |
| 8    | Stimulation at 290 °C    | Tx       |
| 9    | IR Bleaching (at 320 °C) | -        |
| 10   | Return to 1              | -        |

**Table S3.** Generalized single-aliquot regenerated sequence.

| Step | Treatment                       | Observed |
|------|---------------------------------|----------|
| 1    | Give dose                       | -        |
| 2    | Pre-heat at 240–320 °C for 60 s | -        |
| 3    | IRSL measurement at 50 °C       | Lx       |
| 4    | Give test dose                  | -        |
| 5    | Cut-heat at 240–320 °C for 60 s | -        |
| 6    | IRSL-measurement at 50 °C       | Tx       |
| 7    | IR bleaching at 320 °C          | Tx       |
| 8    | Return to 1                     | -        |

**Table S4.** Given doses and delay times of each cycle related to the fading of exemplary samples C-T2-L and A5-L.

| Sample Name | Selected/Used |     | Fading Time |             |               |               |                   |
|-------------|---------------|-----|-------------|-------------|---------------|---------------|-------------------|
|             | IRSL          | TL  | Given Dose  | Delay 1     | Delay 2       | Delay 3       | Delay 4           |
| C-T2-L      | 50,290        | 320 | 800         | 5h          | 17h,54m,59s   | 2d,1h,49m,1s  | 11d,18d,41m,55s   |
| A5-L        | 50,290        | 320 | 1000        | 17h,10m,36s | 1d,7h,35m,43s | 3d,5h,14m,53s | 6m,11d,5h,12m,19s |

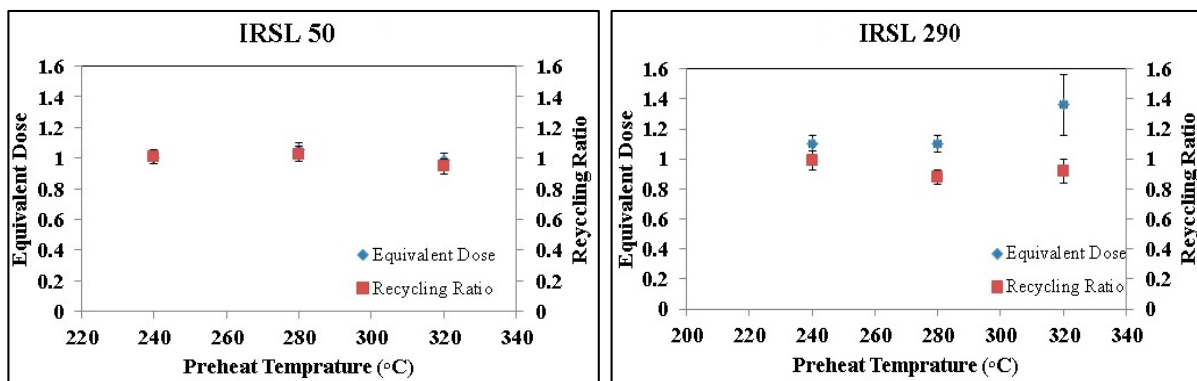

Figure S1. Dose recovery and recycling ratio of exemplary sample A1-L (pre-heat plateau test).

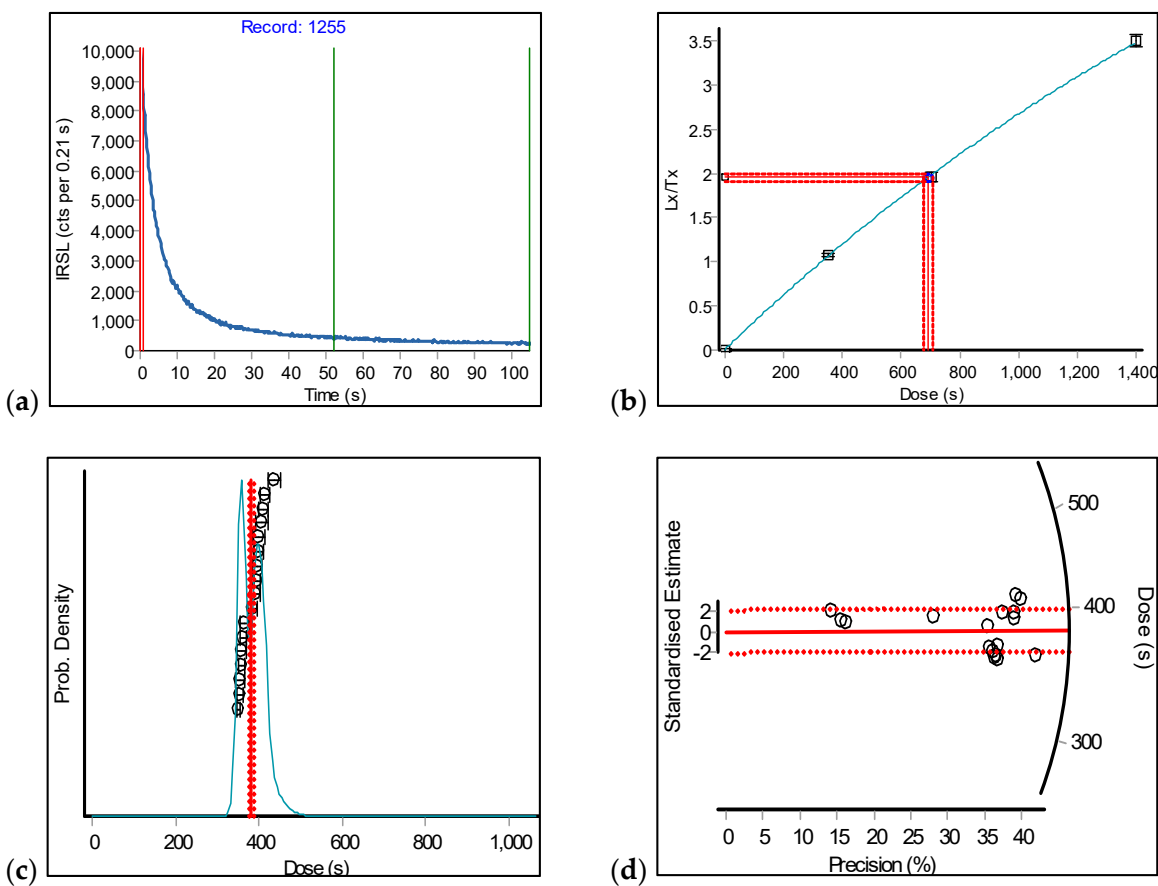

Figure S2. Measurements of exemplary sample A5-L (IRSL 50) (a) Decay curve, (b) Growth curve fitting, and De distribution of feldspar grains in (c) weighted mean, and (d) central age.

### Sample C-T2-L

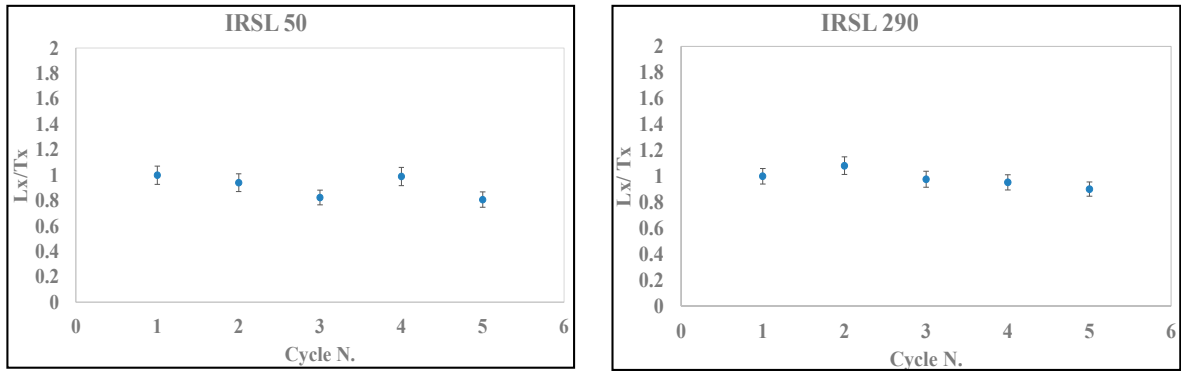

### Sample A5-L

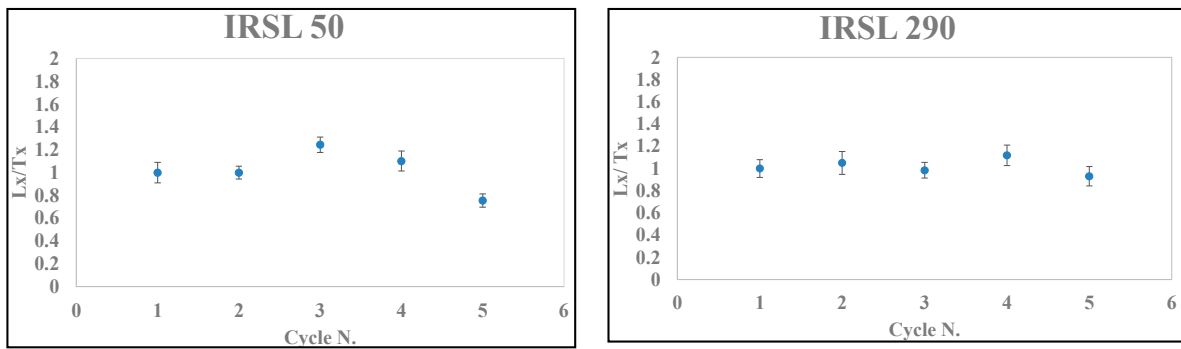

**Figure S3.** Fading tests of exemplary samples C-T2-L and A5-L. The sequence of Table S2 was applied, and pre-heat and cut-heat were fixed at 320°C. Cycle 1 is the prompt measurement, and cycles 2 to 5 represent the delays according to Table S4.
